# Supplementary material
Source: Springer Nature journal article supplement (https://www.springermedizin.de/resource/supplementary/12911_2011_459_MOESM5_ESM.pdf/9526128)

# Distribution of dosage forms per drug monograph

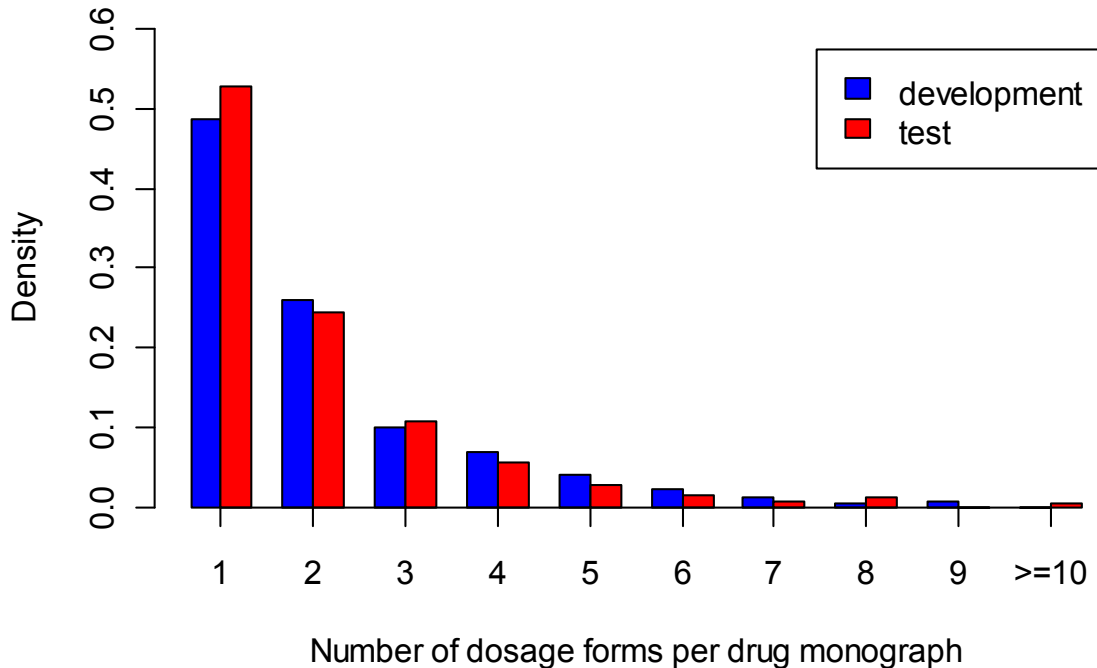

Supplement: MOESM5 [file 9526128]
